# Supplementary material
Source: MDPI journal article supplement (https://www.mdpi.com/2304-6740/11/1/4)
Supplement: s1 [file s1]

**Supplementary Information**

for

**Tetramethylcyclopentadienyl Samarium(II) Chemistry: Isolation of a Bimetallic  
Sm(II)/Sm(II) Complex**

Joseph Q. Nguyen, Joseph W. Ziller, and William J. Evans

Department of Chemistry, University of California, Irvine,  
Irvine, CA 92697-2025, USA

## **Table of Contents**

|                                                                                                                                                                                                                                                                             |           |
|-----------------------------------------------------------------------------------------------------------------------------------------------------------------------------------------------------------------------------------------------------------------------------|-----------|
| <b>NMR Spectroscopy.....</b>                                                                                                                                                                                                                                                | <b>3</b>  |
| <b>Infrared Spectroscopy.....</b>                                                                                                                                                                                                                                           | <b>6</b>  |
| <b>UV-Visible Spectroscopy.....</b>                                                                                                                                                                                                                                         | <b>9</b>  |
| <b>X-ray Data Collection, Structure Determination, and Refinement for (C<sub>5</sub>Me<sub>4</sub>H)<sub>2</sub>Sm(DME),<br/>2. ....</b>                                                                                                                                    | <b>14</b> |
| <b>X-ray Data Collection, Structure Determination, and Refinement for (C<sub>5</sub>Me<sub>4</sub>H)<sub>2</sub>Sm(<math>\mu</math>-<math>\eta^3</math>:<math>\eta^5</math>-<br/>C<sub>5</sub>Me<sub>4</sub>H)Sm(C<sub>5</sub>Me<sub>4</sub>H)(THF)<sub>2</sub>, 3.....</b> | <b>31</b> |
| <b>References .....</b>                                                                                                                                                                                                                                                     | <b>48</b> |

## NMR Spectroscopy

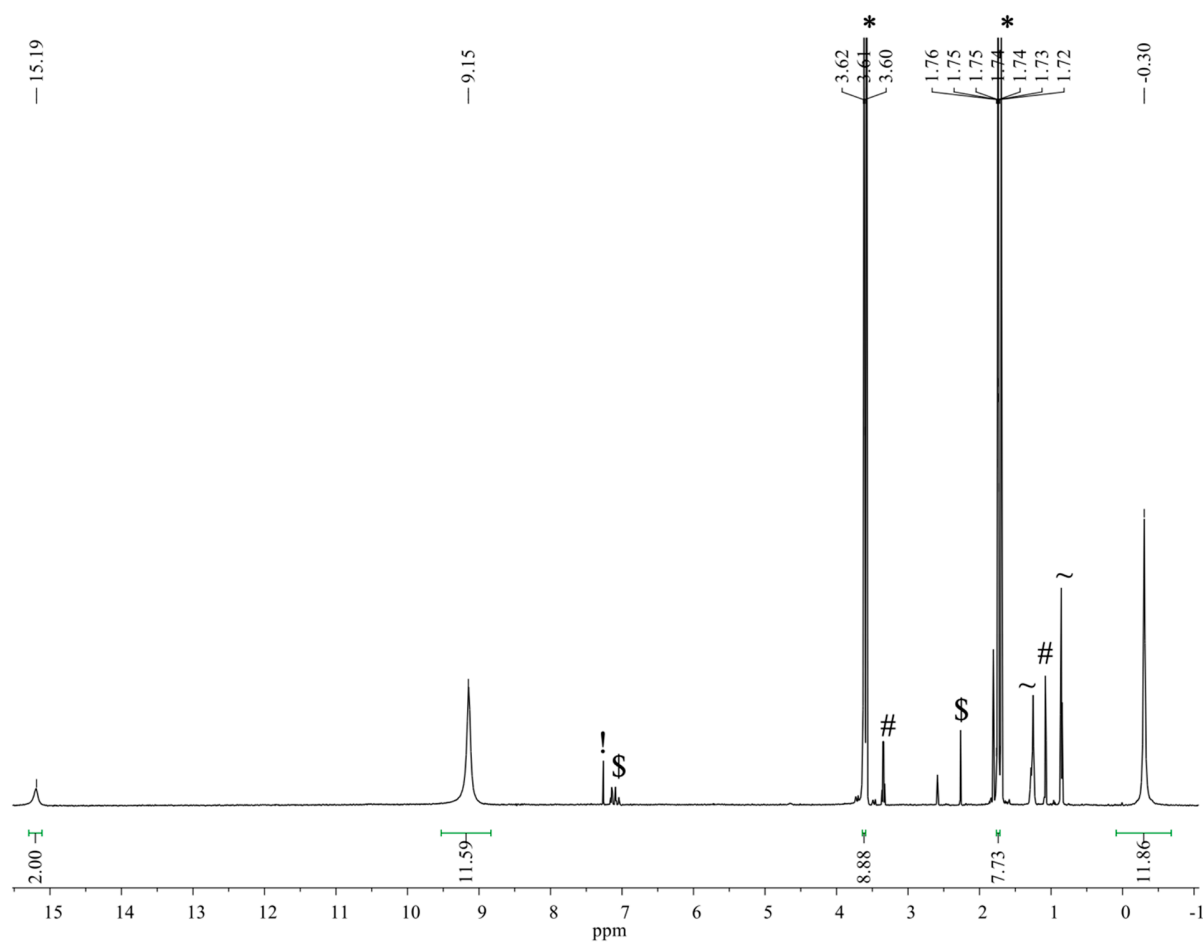

**Figure S1.**  $^1\text{H}$  NMR spectrum of  $(\text{C}_5\text{Me}_4\text{H})_2\text{Sm}(\text{THF})_2$  in  $\text{THF-}d_8$ . Assignable solvent impurities include residual benzene labelled (!), toluene labelled (\$), diethyl ether labelled (#), hexanes labelled (~) in the sample as well as residual solvent signals for  $\text{THF-}d_8$  labelled (\*).

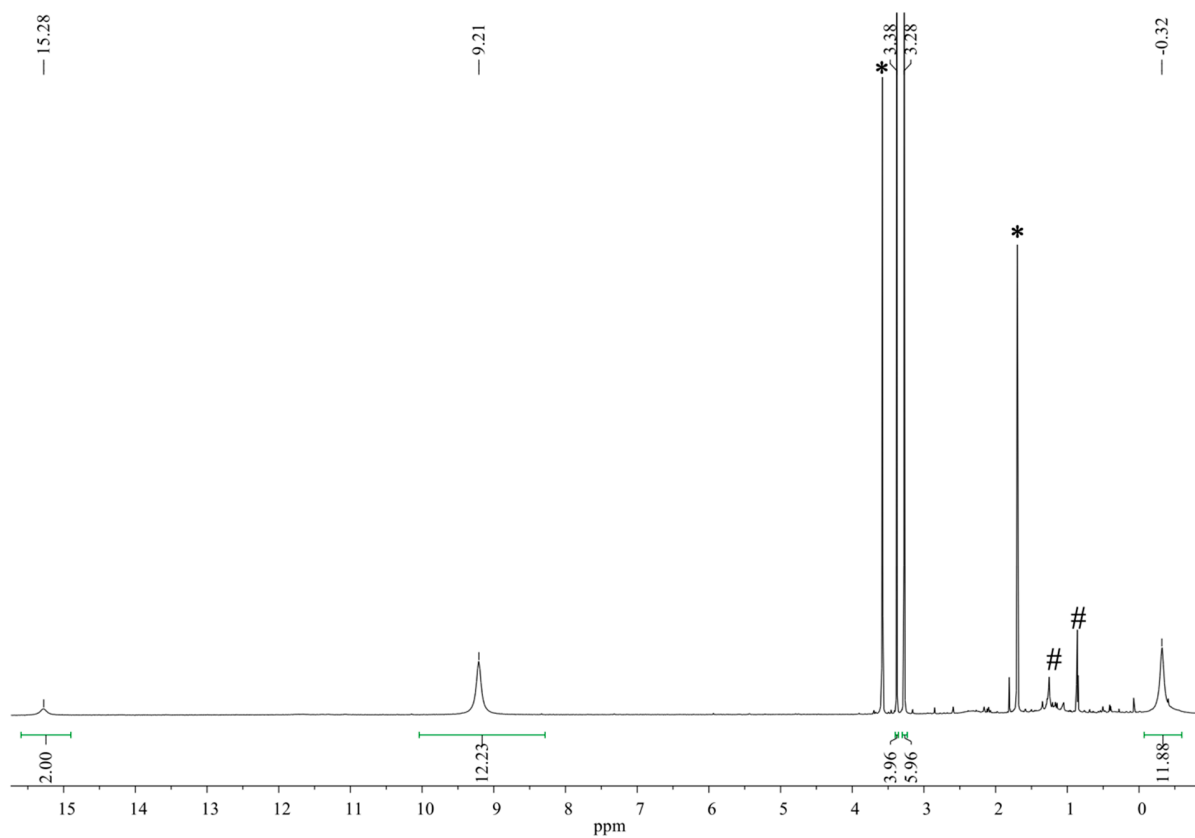

**Figure S2.**  $^1\text{H}$  NMR spectrum of complex **2** in  $\text{THF-}d_8$ . Assignable solvent impurities include residual hexanes labelled (#) in the sample and the solvent residual signals of  $\text{THF-}d_8$  labelled (\*).

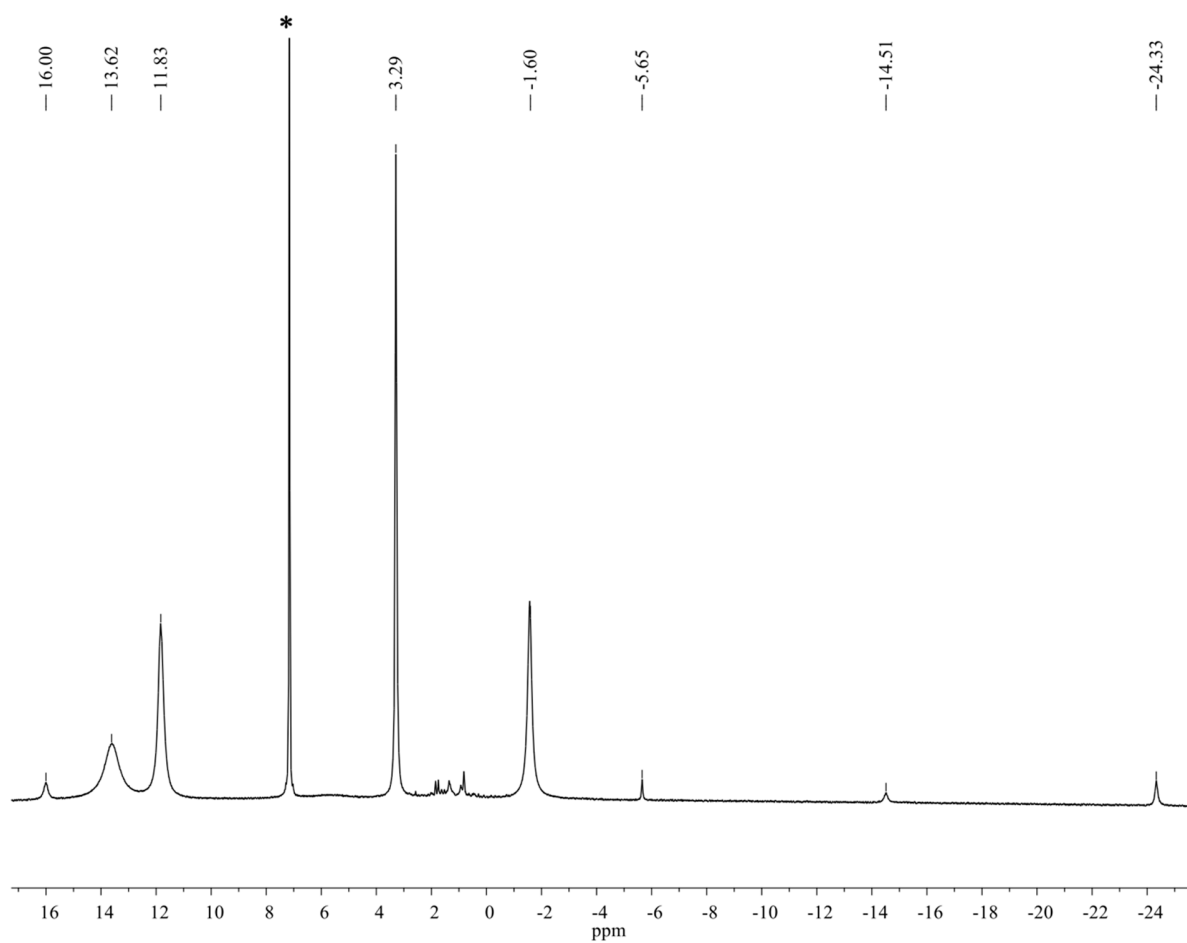

**Figure S3.**  $^1\text{H}$  NMR spectrum of complex **3** in  $\text{C}_6\text{D}_6$ . The resonance labelled with (\*) was assigned to the solvent residual signal of  $\text{C}_6\text{D}_6$ . The paramagnetism of  $\text{Sm}(\text{II})$  precluded a definitive assignment.

## Infrared Spectroscopy

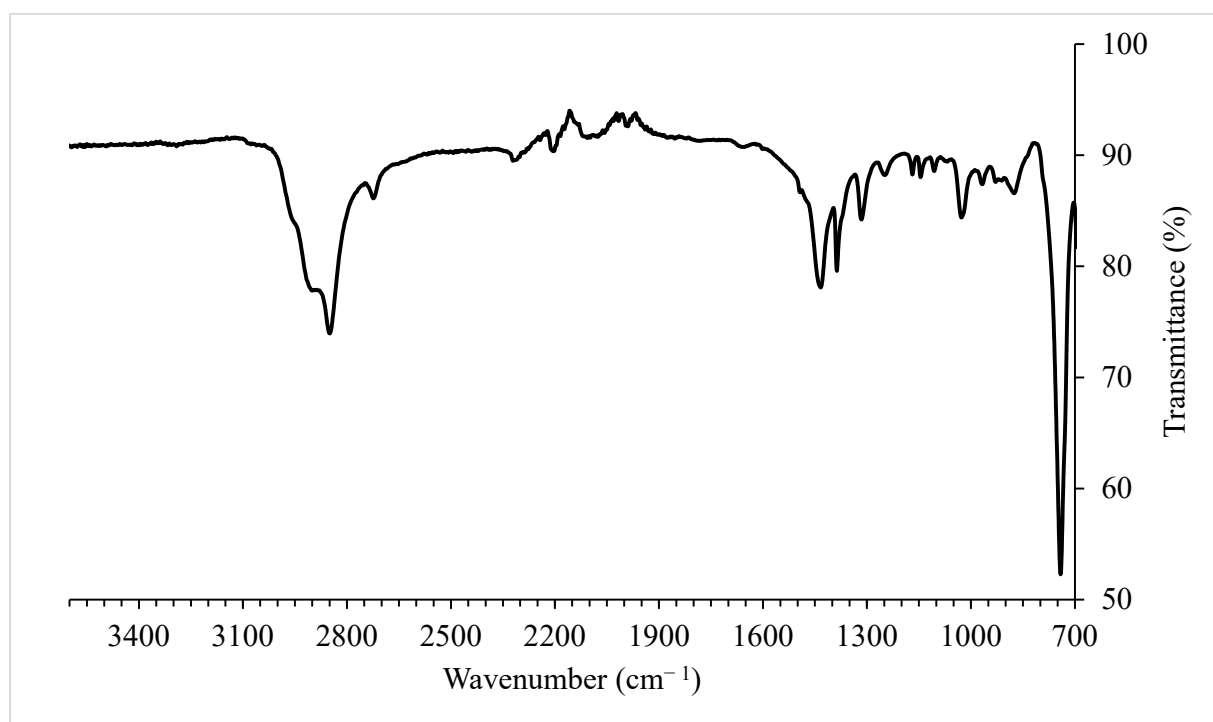

**Figure S4.** Infrared spectrum of the purple, toluene insoluble solids, **1**.

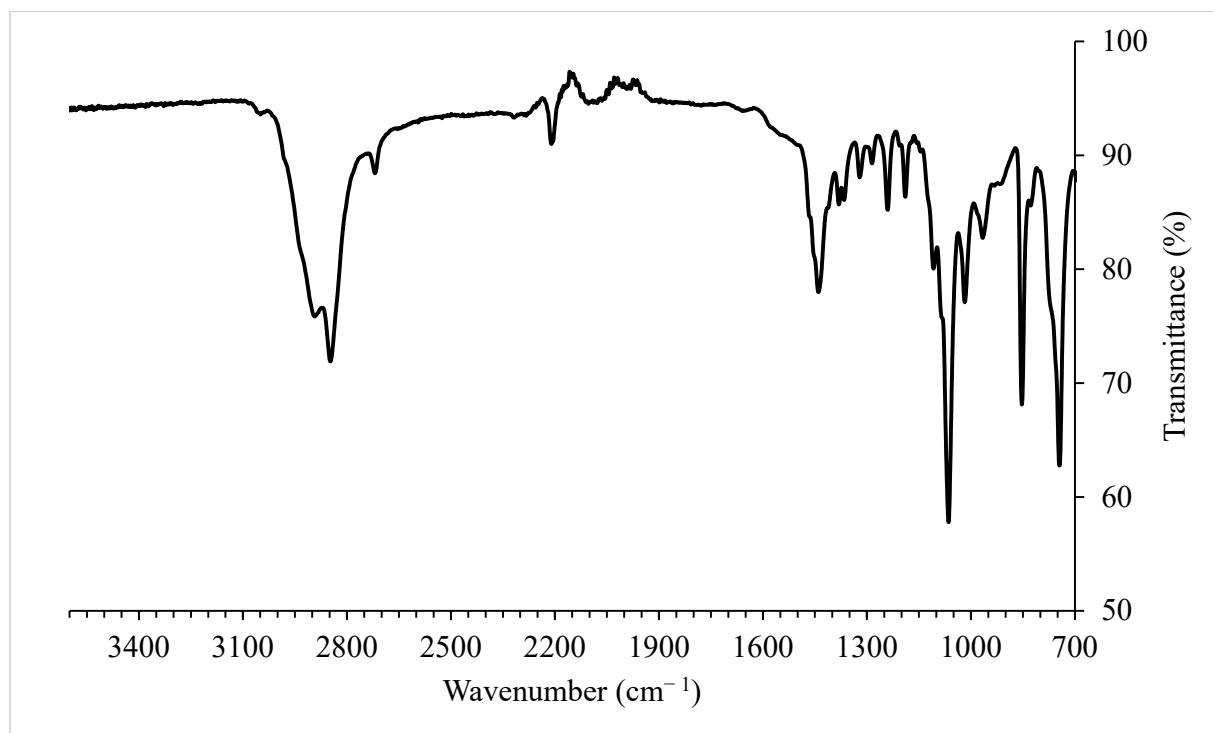

**Figure S5.** Infrared spectrum of  $(\text{C}_5\text{Me}_4\text{H})_2\text{Sm}^{\text{II}}(\text{DME})$ , **2**.

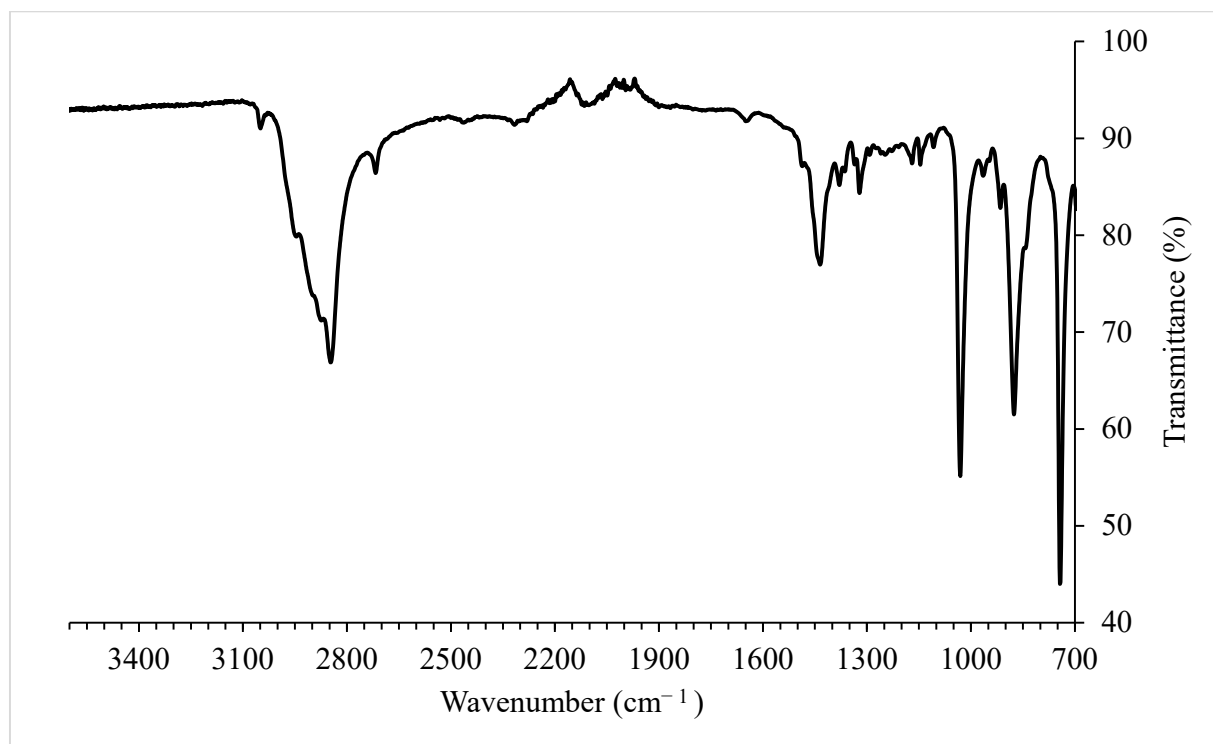

**Figure S6.** Infrared spectrum of  $(\text{C}_5\text{Me}_4\text{H})_2\text{Sm}^{\text{II}}(\mu\text{-}\eta^3\text{:}\eta^5\text{-C}_5\text{Me}_4\text{H})\text{Sm}^{\text{II}}(\text{C}_5\text{Me}_4\text{H})(\text{THF})_2$ , **3**.



### UV-Visible Spectroscopy

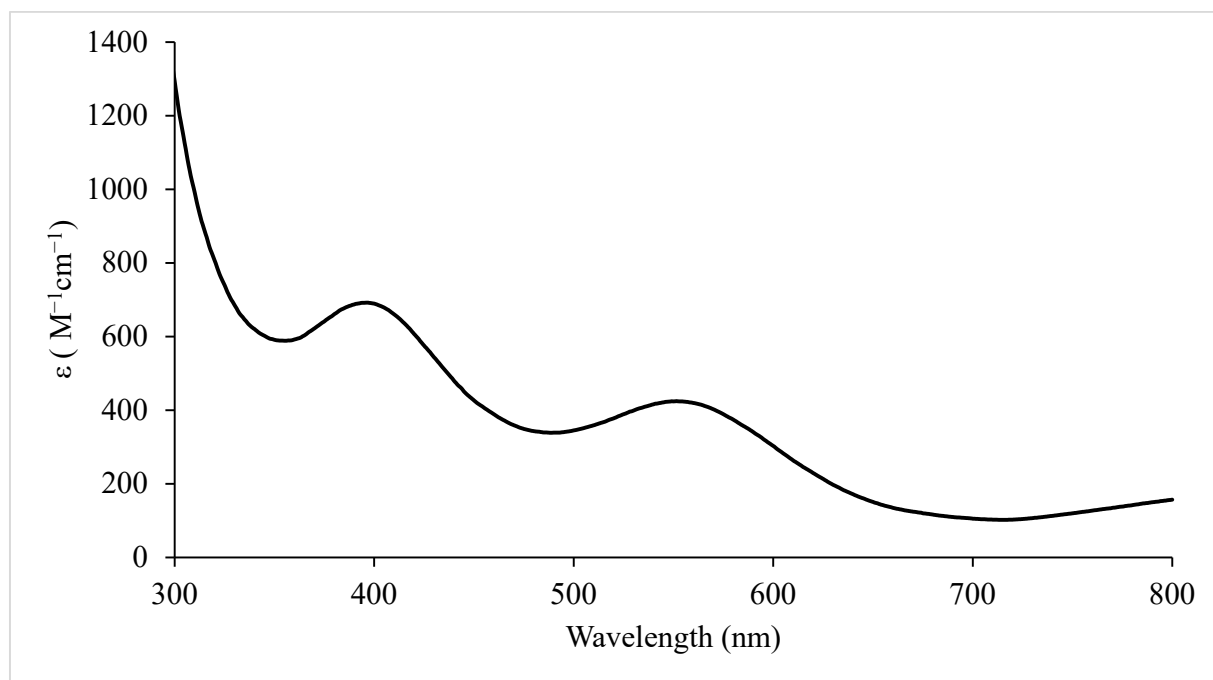

**Figure S7.** UV-visible spectrum of **1**, presumed to be  $[(\text{C}_5\text{Me}_4\text{H})_2\text{Sm}]_n$  as a solid and  $(\text{C}_5\text{Me}_4\text{H})_2\text{Sm}(\text{THF})_2$  in THF solution, in THF at room temperature.

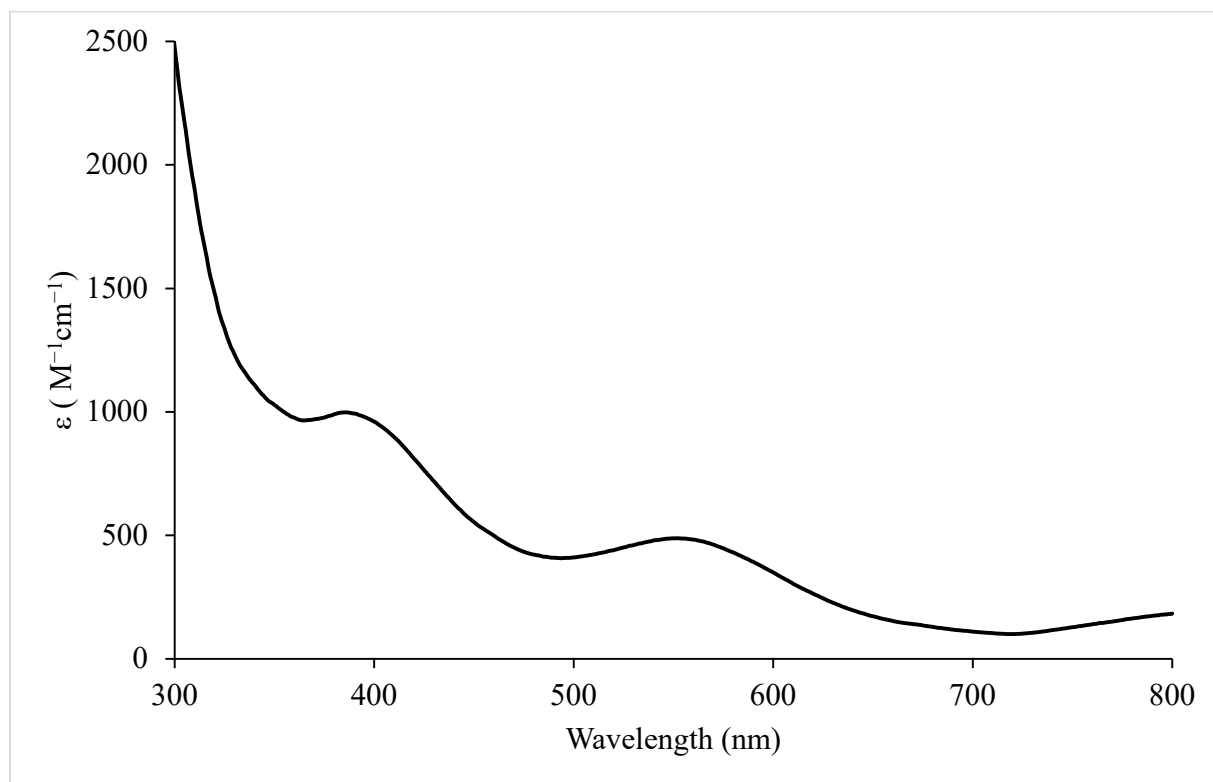

**Figure S8.** UV-visible spectrum of **2** in THF at room temperature.

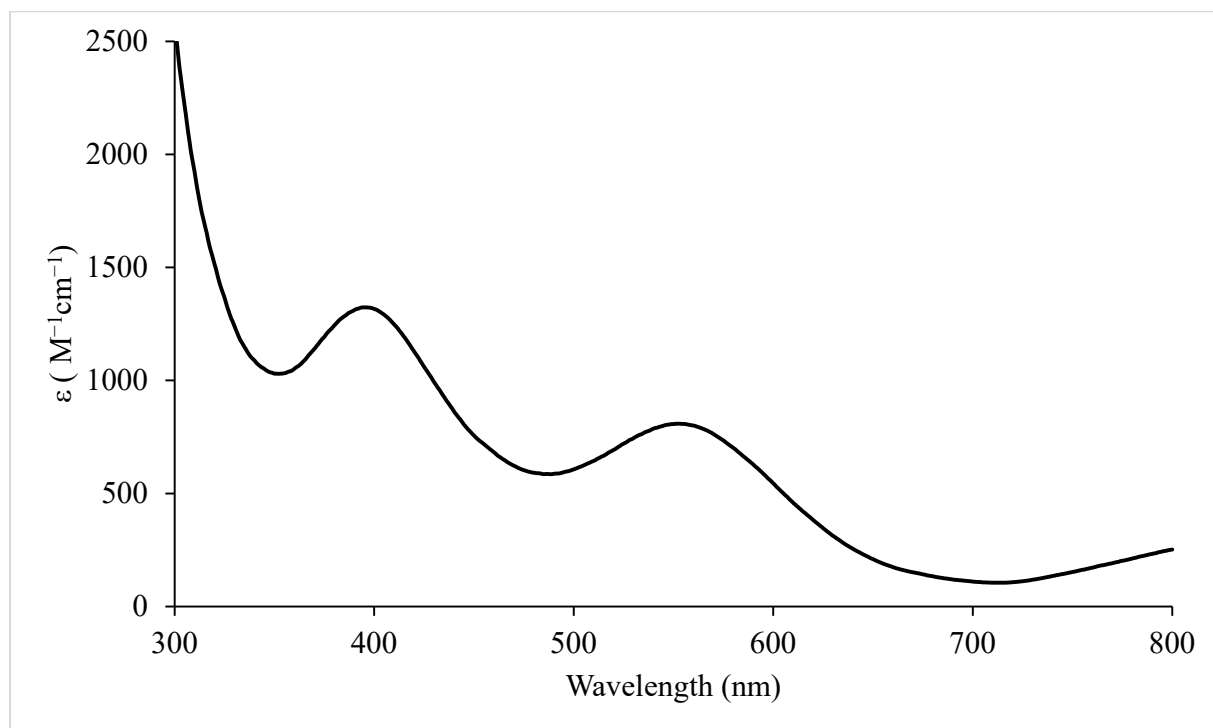

**Figure S9.** UV-visible spectrum of **3** in THF at room temperature.

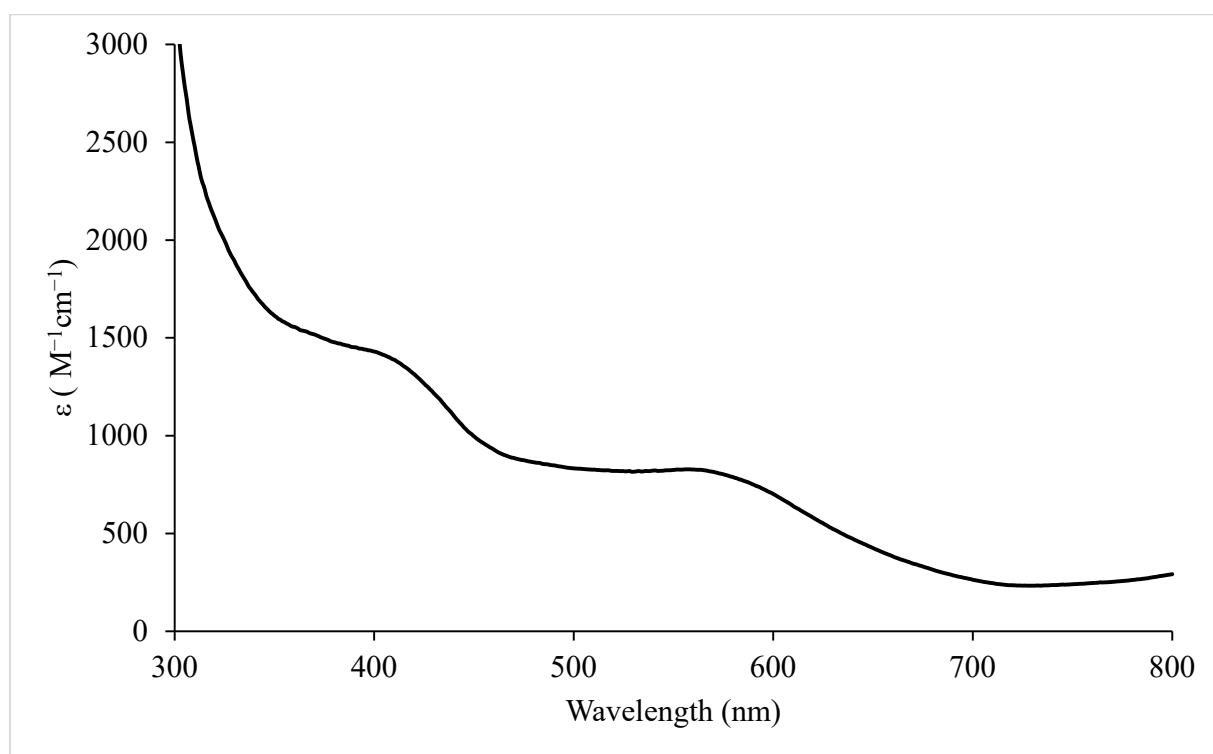

**Figure S10.** UV-visible spectrum of **3** in toluene at room temperature.

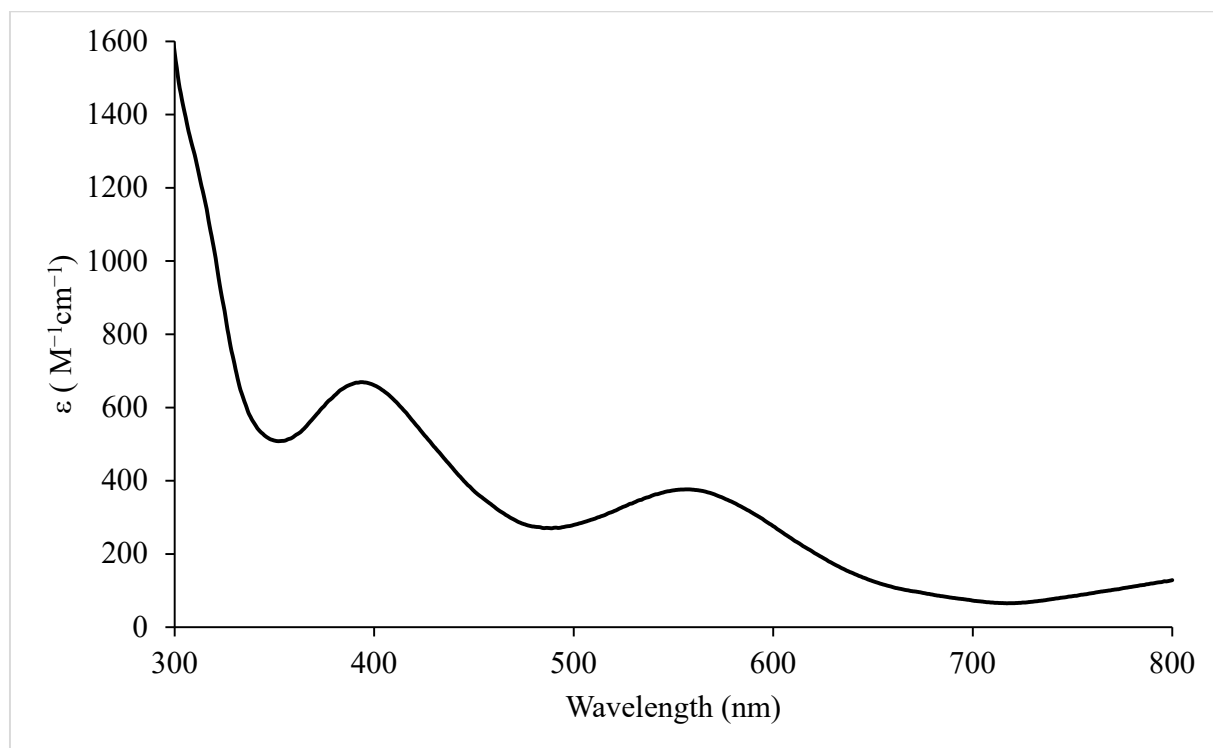

**Figure S11.** UV-visible spectrum of  $(C_5Me_5)_2Sm(THF)_2$  in THF at room temperature.

## X-ray Data Collection, Structure Determination, and Refinement for (C<sub>5</sub>Me<sub>4</sub>H)<sub>2</sub>Sm(DME), 2.

A green crystal of approximate dimensions 0.114 x 0.209 x 0.481 mm was mounted in a cryoloop and transferred to a Bruker SMART APEX II diffractometer system. The APEX2<sup>1</sup> program package was used to determine the unit-cell parameters and for data collection (30 sec/frame scan time). The raw frame data was processed using SAINT<sup>2</sup> and SADABS<sup>3</sup> to yield the reflection data file. Subsequent calculations were carried out using the SHELXTL<sup>4</sup> program package. The diffraction symmetry was *mmm* and the systematic absences were consistent with the orthorhombic space group *Pbca* that was later determined to be correct.

The structure was solved by direct methods and refined on F<sup>2</sup> by full-matrix least-squares techniques. The analytical scattering factors<sup>5</sup> for neutral atoms were used throughout the analysis. Hydrogen atoms were included using a riding model. There were two molecules of the formula unit present.

Least-squares analysis yielded wR2 = 0.0470 and Goof = 1.039 for 469 variables refined against 12415 data (0.72 Å), R1 = 0.0195 for those 10938 data with I > 2.0σ(I).

**Table S1.** Crystal data and structure refinement for jqn48.

|                     |                                                                |
|---------------------|----------------------------------------------------------------|
| Identification code | jqn48 (Joseph Nguyen)                                          |
| Empirical formula   | C <sub>44</sub> H <sub>72</sub> O <sub>4</sub> Sm <sub>2</sub> |
| Formula weight      | 965.71                                                         |
| Temperature         | 93(2) K                                                        |

|                                 |                                             |                       |
|---------------------------------|---------------------------------------------|-----------------------|
| Wavelength                      | 0.71073 Å                                   |                       |
| Crystal system                  | Orthorhombic                                |                       |
| Space group                     | <i>Pbca</i>                                 |                       |
| Unit cell dimensions            | a = 17.435(4) Å                             | $\alpha = 90^\circ$ . |
|                                 | b = 16.479(3) Å                             | $\beta = 90^\circ$ .  |
|                                 | c = 30.782(6) Å                             | $\gamma = 90^\circ$ . |
| Volume                          | 8845(3) Å <sup>3</sup>                      |                       |
| Z                               | 8                                           |                       |
| Density (calculated)            | 1.450 Mg/m <sup>3</sup>                     |                       |
| Absorption coefficient          | 2.667 mm <sup>-1</sup>                      |                       |
| F(000)                          | 3936                                        |                       |
| Crystal color                   | green                                       |                       |
| Crystal size                    | 0.481 x 0.209 x 0.114 mm <sup>3</sup>       |                       |
| Theta range for data collection | 1.323 to 29.575°                            |                       |
| Index ranges                    | -24 ≤ h ≤ 24, -22 ≤ k ≤ 22, -42 ≤ l ≤ 42    |                       |
| Reflections collected           | 211448                                      |                       |
| Independent reflections         | 12415 [R(int) = 0.0439]                     |                       |
| Completeness to theta = 25.242° | 100.0 %                                     |                       |
| Absorption correction           | Semi-empirical from equivalents             |                       |
| Max. and min. transmission      | 0.4330 and 0.3062                           |                       |
| Refinement method               | Full-matrix least-squares on F <sup>2</sup> |                       |
| Data / restraints / parameters  | 12415 / 0 / 469                             |                       |

|                                                  |                                    |
|--------------------------------------------------|------------------------------------|
| Goodness-of-fit on $F^2$                         | 1.039                              |
| Final R indices [ $I > 2\sigma(I)$ = 10938 data] | R1 = 0.0195, wR2 = 0.0443          |
| R indices (all data, 0.72 Å)                     | R1 = 0.0255, wR2 = 0.0470          |
| Largest diff. peak and hole                      | 0.616 and -0.483 e.Å <sup>-3</sup> |

**Table S2.** Bond lengths [Å] and angles [°] for jqn48.

---

|             |            |
|-------------|------------|
| Sm(1)-Cnt1  | 2.534      |
| Sm(1)-Cnt2  | 2.527      |
| Sm(1)-O(1)  | 2.5906(13) |
| Sm(1)-O(2)  | 2.6174(13) |
| Sm(1)-C(14) | 2.7408(19) |
| Sm(1)-C(10) | 2.7465(18) |
| Sm(1)-C(5)  | 2.7868(18) |
| Sm(1)-C(4)  | 2.7962(18) |
| Sm(1)-C(3)  | 2.8072(18) |
| Sm(1)-C(1)  | 2.8130(18) |
| Sm(1)-C(13) | 2.8189(18) |
| Sm(1)-C(11) | 2.8207(18) |
| Sm(1)-C(2)  | 2.8214(18) |
| Sm(1)-C(12) | 2.8666(18) |
| Sm(2)-Cnt3  | 2.528      |
| Sm(2)-Cnt4  | 2.544      |



|             |            |
|-------------|------------|
| Sm(2)-O(4)  | 2.6014(13) |
| Sm(2)-O(3)  | 2.6116(13) |
| Sm(2)-C(27) | 2.7600(18) |
| Sm(2)-C(26) | 2.7859(19) |
| Sm(2)-C(36) | 2.7866(18) |
| Sm(2)-C(23) | 2.7942(19) |
| Sm(2)-C(32) | 2.8101(18) |
| Sm(2)-C(35) | 2.8191(18) |
| Sm(2)-C(25) | 2.824(2)   |
| Sm(2)-C(33) | 2.8263(17) |
| Sm(2)-C(24) | 2.830(2)   |
| Sm(2)-C(34) | 2.8335(18) |
| O(1)-C(19)  | 1.423(2)   |
| O(1)-C(20)  | 1.439(2)   |
| O(2)-C(22)  | 1.423(2)   |
| O(2)-C(21)  | 1.433(2)   |
| O(3)-C(41)  | 1.427(2)   |
| O(3)-C(42)  | 1.432(2)   |
| O(4)-C(44)  | 1.425(2)   |
| O(4)-C(43)  | 1.441(2)   |
| C(1)-C(5)   | 1.412(3)   |
| C(1)-C(2)   | 1.413(3)   |
| C(1)-C(6)   | 1.507(3)   |

|             |          |
|-------------|----------|
| C(2)-C(3)   | 1.417(3) |
| C(2)-C(7)   | 1.506(3) |
| C(3)-C(4)   | 1.414(3) |
| C(3)-C(8)   | 1.508(3) |
| C(4)-C(5)   | 1.418(3) |
| C(4)-C(9)   | 1.503(3) |
| C(10)-C(14) | 1.414(3) |
| C(10)-C(11) | 1.415(3) |
| C(10)-C(15) | 1.502(3) |
| C(11)-C(12) | 1.419(3) |
| C(11)-C(16) | 1.502(3) |
| C(12)-C(13) | 1.416(2) |
| C(12)-C(17) | 1.505(3) |
| C(13)-C(14) | 1.416(3) |
| C(13)-C(18) | 1.502(3) |
| C(20)-C(21) | 1.494(3) |
| C(23)-C(24) | 1.398(3) |
| C(23)-C(27) | 1.411(3) |
| C(23)-C(28) | 1.508(3) |
| C(24)-C(25) | 1.420(3) |
| C(24)-C(29) | 1.512(3) |
| C(25)-C(26) | 1.423(3) |
| C(25)-C(30) | 1.502(3) |

|                   |           |
|-------------------|-----------|
| C(26)-C(27)       | 1.409(3)  |
| C(26)-C(31)       | 1.503(3)  |
| C(32)-C(36)       | 1.415(3)  |
| C(32)-C(33)       | 1.417(2)  |
| C(32)-C(37)       | 1.503(3)  |
| C(33)-C(34)       | 1.419(3)  |
| C(33)-C(38)       | 1.508(2)  |
| C(34)-C(35)       | 1.417(2)  |
| C(34)-C(39)       | 1.503(2)  |
| C(35)-C(36)       | 1.414(3)  |
| C(35)-C(40)       | 1.508(3)  |
| C(42)-C(43)       | 1.500(3)  |
| Cnt1-Sm(1)-O(1)   | 111.3     |
| Cnt1-Sm(1)-O(2)   | 112.6     |
| Cnt2-Sm(1)-O(1)   | 112.5     |
| Cnt2-Sm(1)-O(2)   | 107.0     |
| Cnt1-Sm(1)-Cnt2   | 130.2     |
| O(1)-Sm(1)-O(2)   | 63.92(4)  |
| O(1)-Sm(1)-C(14)  | 130.80(5) |
| O(2)-Sm(1)-C(14)  | 129.21(5) |
| O(1)-Sm(1)-C(10)  | 133.49(5) |
| O(2)-Sm(1)-C(10)  | 100.90(5) |
| C(14)-Sm(1)-C(10) | 29.85(5)  |

|                  |           |
|------------------|-----------|
| O(1)-Sm(1)-C(5)  | 136.01(5) |
| O(2)-Sm(1)-C(5)  | 124.13(5) |
| C(14)-Sm(1)-C(5) | 80.91(5)  |
| C(10)-Sm(1)-C(5) | 89.76(5)  |
| O(1)-Sm(1)-C(4)  | 111.49(5) |
| O(2)-Sm(1)-C(4)  | 137.03(5) |
| C(14)-Sm(1)-C(4) | 87.71(6)  |
| C(10)-Sm(1)-C(4) | 108.28(6) |
| C(5)-Sm(1)-C(4)  | 29.42(5)  |
| O(1)-Sm(1)-C(3)  | 87.91(5)  |
| O(2)-Sm(1)-C(3)  | 111.65(5) |
| C(14)-Sm(1)-C(3) | 116.62(6) |
| C(10)-Sm(1)-C(3) | 136.40(6) |
| C(5)-Sm(1)-C(3)  | 48.14(5)  |
| C(4)-Sm(1)-C(3)  | 29.23(6)  |
| O(1)-Sm(1)-C(1)  | 122.10(5) |
| O(2)-Sm(1)-C(1)  | 95.53(5)  |
| C(14)-Sm(1)-C(1) | 104.78(6) |
| C(10)-Sm(1)-C(1) | 102.14(5) |
| C(5)-Sm(1)-C(1)  | 29.20(6)  |
| C(4)-Sm(1)-C(1)  | 48.40(6)  |
| C(3)-Sm(1)-C(1)  | 48.14(5)  |
| O(1)-Sm(1)-C(13) | 101.38(5) |

|                   |           |
|-------------------|-----------|
| O(2)-Sm(1)-C(13)  | 124.05(5) |
| C(14)-Sm(1)-C(13) | 29.48(5)  |
| C(10)-Sm(1)-C(13) | 48.70(5)  |
| C(5)-Sm(1)-C(13)  | 104.04(6) |
| C(4)-Sm(1)-C(13)  | 98.91(6)  |
| C(3)-Sm(1)-C(13)  | 121.85(6) |
| C(1)-Sm(1)-C(13)  | 131.65(6) |
| O(1)-Sm(1)-C(11)  | 104.66(5) |
| O(2)-Sm(1)-C(11)  | 81.94(5)  |
| C(14)-Sm(1)-C(11) | 48.55(5)  |
| C(10)-Sm(1)-C(11) | 29.40(5)  |
| C(5)-Sm(1)-C(11)  | 119.06(5) |
| C(4)-Sm(1)-C(11)  | 135.61(5) |
| C(3)-Sm(1)-C(11)  | 164.84(5) |
| C(1)-Sm(1)-C(11)  | 126.46(5) |
| C(13)-Sm(1)-C(11) | 48.09(5)  |
| O(1)-Sm(1)-C(2)   | 93.85(5)  |
| O(2)-Sm(1)-C(2)   | 88.86(5)  |
| C(14)-Sm(1)-C(2)  | 128.84(6) |
| C(10)-Sm(1)-C(2)  | 131.20(5) |
| C(5)-Sm(1)-C(2)   | 47.95(6)  |
| C(4)-Sm(1)-C(2)   | 48.17(6)  |
| C(3)-Sm(1)-C(2)   | 29.15(6)  |

|                   |           |
|-------------------|-----------|
| C(1)-Sm(1)-C(2)   | 29.05(5)  |
| C(13)-Sm(1)-C(2)  | 147.07(6) |
| C(11)-Sm(1)-C(2)  | 152.89(5) |
| O(1)-Sm(1)-C(12)  | 87.85(5)  |
| O(2)-Sm(1)-C(12)  | 95.24(5)  |
| C(14)-Sm(1)-C(12) | 48.03(5)  |
| C(10)-Sm(1)-C(12) | 48.10(5)  |
| C(5)-Sm(1)-C(12)  | 128.91(5) |
| C(4)-Sm(1)-C(12)  | 127.72(5) |
| C(3)-Sm(1)-C(12)  | 147.43(5) |
| C(1)-Sm(1)-C(12)  | 149.88(5) |
| C(13)-Sm(1)-C(12) | 28.84(5)  |
| C(11)-Sm(1)-C(12) | 28.89(5)  |
| C(2)-Sm(1)-C(12)  | 175.90(5) |
| Cnt3-Sm(2)-O(3)   | 117.0     |
| Cnt3-Sm(2)-O(4)   | 106.6     |
| Cnt4-Sm(2)-O(3)   | 106.4     |
| Cnt4-Sm(2)-O(4)   | 114.0     |
| Cnt3-Sm(2)-Cnt4   | 130.3     |
| O(4)-Sm(2)-O(3)   | 63.21(4)  |
| O(4)-Sm(2)-C(27)  | 131.56(5) |
| O(3)-Sm(2)-C(27)  | 128.41(5) |
| O(4)-Sm(2)-C(26)  | 117.54(6) |

|                   |           |
|-------------------|-----------|
| O(3)-Sm(2)-C(26)  | 99.70(5)  |
| C(27)-Sm(2)-C(26) | 29.42(6)  |
| O(4)-Sm(2)-C(36)  | 122.68(5) |
| O(3)-Sm(2)-C(36)  | 131.71(5) |
| C(27)-Sm(2)-C(36) | 85.84(6)  |
| C(26)-Sm(2)-C(36) | 112.84(6) |
| O(4)-Sm(2)-C(23)  | 107.72(5) |
| O(3)-Sm(2)-C(23)  | 141.20(5) |
| C(27)-Sm(2)-C(23) | 29.44(6)  |
| C(26)-Sm(2)-C(23) | 48.58(6)  |
| C(36)-Sm(2)-C(23) | 86.01(6)  |
| O(4)-Sm(2)-C(32)  | 94.84(5)  |
| O(3)-Sm(2)-C(32)  | 113.96(5) |
| C(27)-Sm(2)-C(32) | 112.93(6) |
| C(26)-Sm(2)-C(32) | 141.51(6) |
| C(36)-Sm(2)-C(32) | 29.28(5)  |
| C(23)-Sm(2)-C(32) | 104.13(6) |
| O(4)-Sm(2)-C(35)  | 139.09(5) |
| O(3)-Sm(2)-C(35)  | 110.94(5) |
| C(27)-Sm(2)-C(35) | 85.46(6)  |
| C(26)-Sm(2)-C(35) | 103.36(6) |
| C(36)-Sm(2)-C(35) | 29.21(5)  |
| C(23)-Sm(2)-C(35) | 99.50(6)  |

|                   |           |
|-------------------|-----------|
| C(32)-Sm(2)-C(35) | 48.29(5)  |
| O(4)-Sm(2)-C(25)  | 88.96(6)  |
| O(3)-Sm(2)-C(25)  | 93.23(5)  |
| C(27)-Sm(2)-C(25) | 48.12(6)  |
| C(26)-Sm(2)-C(25) | 29.37(7)  |
| C(36)-Sm(2)-C(25) | 132.08(6) |
| C(23)-Sm(2)-C(25) | 48.00(6)  |
| C(32)-Sm(2)-C(25) | 151.20(6) |
| C(35)-Sm(2)-C(25) | 131.69(6) |
| O(4)-Sm(2)-C(33)  | 91.33(5)  |
| O(3)-Sm(2)-C(33)  | 86.58(5)  |
| C(27)-Sm(2)-C(33) | 131.77(6) |
| C(26)-Sm(2)-C(33) | 150.26(6) |
| C(36)-Sm(2)-C(33) | 47.97(5)  |
| C(23)-Sm(2)-C(33) | 132.20(6) |
| C(32)-Sm(2)-C(33) | 29.12(5)  |
| C(35)-Sm(2)-C(33) | 48.05(5)  |
| C(25)-Sm(2)-C(33) | 179.53(7) |
| O(4)-Sm(2)-C(24)  | 83.80(5)  |
| O(3)-Sm(2)-C(24)  | 115.64(6) |
| C(27)-Sm(2)-C(24) | 47.90(6)  |
| C(26)-Sm(2)-C(24) | 48.27(7)  |
| C(36)-Sm(2)-C(24) | 112.65(6) |



|                   |            |
|-------------------|------------|
| C(23)-Sm(2)-C(24) | 28.78(6)   |
| C(32)-Sm(2)-C(24) | 122.99(6)  |
| C(35)-Sm(2)-C(24) | 128.18(6)  |
| C(25)-Sm(2)-C(24) | 29.09(7)   |
| C(33)-Sm(2)-C(24) | 151.32(6)  |
| O(4)-Sm(2)-C(34)  | 115.82(5)  |
| O(3)-Sm(2)-C(34)  | 84.95(5)   |
| C(27)-Sm(2)-C(34) | 112.20(6)  |
| C(26)-Sm(2)-C(34) | 122.00(6)  |
| C(36)-Sm(2)-C(34) | 47.86(5)   |
| C(23)-Sm(2)-C(34) | 128.48(6)  |
| C(32)-Sm(2)-C(34) | 48.00(5)   |
| C(35)-Sm(2)-C(34) | 29.04(5)   |
| C(25)-Sm(2)-C(34) | 150.51(6)  |
| C(33)-Sm(2)-C(34) | 29.05(5)   |
| C(24)-Sm(2)-C(34) | 157.22(6)  |
| C(19)-O(1)-C(20)  | 110.97(15) |
| C(19)-O(1)-Sm(1)  | 123.00(12) |
| C(20)-O(1)-Sm(1)  | 115.61(10) |
| C(22)-O(2)-C(21)  | 111.56(15) |
| C(22)-O(2)-Sm(1)  | 122.97(12) |
| C(21)-O(2)-Sm(1)  | 115.72(10) |
| C(41)-O(3)-C(42)  | 111.20(14) |

|                  |            |
|------------------|------------|
| C(41)-O(3)-Sm(2) | 124.17(11) |
| C(42)-O(3)-Sm(2) | 118.31(10) |
| C(44)-O(4)-C(43) | 111.30(14) |
| C(44)-O(4)-Sm(2) | 119.67(11) |
| C(43)-O(4)-Sm(2) | 116.69(10) |
| C(5)-C(1)-C(2)   | 107.56(16) |
| C(5)-C(1)-C(6)   | 125.30(18) |
| C(2)-C(1)-C(6)   | 126.87(19) |
| C(5)-C(1)-Sm(1)  | 74.37(10)  |
| C(2)-C(1)-Sm(1)  | 75.80(10)  |
| C(6)-C(1)-Sm(1)  | 120.44(13) |
| C(1)-C(2)-C(3)   | 108.20(17) |
| C(1)-C(2)-C(7)   | 125.89(19) |
| C(3)-C(2)-C(7)   | 125.75(18) |
| C(1)-C(2)-Sm(1)  | 75.14(10)  |
| C(3)-C(2)-Sm(1)  | 74.87(10)  |
| C(7)-C(2)-Sm(1)  | 119.70(13) |
| C(4)-C(3)-C(2)   | 108.19(16) |
| C(4)-C(3)-C(8)   | 126.24(18) |
| C(2)-C(3)-C(8)   | 125.53(18) |
| C(4)-C(3)-Sm(1)  | 74.95(10)  |
| C(2)-C(3)-Sm(1)  | 75.98(10)  |
| C(8)-C(3)-Sm(1)  | 117.03(12) |

|                   |            |
|-------------------|------------|
| C(3)-C(4)-C(5)    | 107.35(17) |
| C(3)-C(4)-C(9)    | 126.96(18) |
| C(5)-C(4)-C(9)    | 125.64(18) |
| C(3)-C(4)-Sm(1)   | 75.81(10)  |
| C(5)-C(4)-Sm(1)   | 74.92(10)  |
| C(9)-C(4)-Sm(1)   | 117.21(13) |
| C(1)-C(5)-C(4)    | 108.70(16) |
| C(1)-C(5)-Sm(1)   | 76.43(10)  |
| C(4)-C(5)-Sm(1)   | 75.66(10)  |
| C(14)-C(10)-C(11) | 107.96(16) |
| C(14)-C(10)-C(15) | 126.64(18) |
| C(11)-C(10)-C(15) | 125.34(18) |
| C(14)-C(10)-Sm(1) | 74.85(10)  |
| C(11)-C(10)-Sm(1) | 78.21(10)  |
| C(15)-C(10)-Sm(1) | 111.35(12) |
| C(10)-C(11)-C(12) | 107.82(15) |
| C(10)-C(11)-C(16) | 126.81(17) |
| C(12)-C(11)-C(16) | 125.34(17) |
| C(10)-C(11)-Sm(1) | 72.39(10)  |
| C(12)-C(11)-Sm(1) | 77.35(10)  |
| C(16)-C(11)-Sm(1) | 117.59(12) |
| C(13)-C(12)-C(11) | 108.24(16) |
| C(13)-C(12)-C(17) | 125.81(17) |

|                   |            |
|-------------------|------------|
| C(11)-C(12)-C(17) | 125.84(17) |
| C(13)-C(12)-Sm(1) | 73.71(10)  |
| C(11)-C(12)-Sm(1) | 73.76(10)  |
| C(17)-C(12)-Sm(1) | 121.52(12) |
| C(14)-C(13)-C(12) | 107.54(16) |
| C(14)-C(13)-C(18) | 126.43(17) |
| C(12)-C(13)-C(18) | 125.92(17) |
| C(14)-C(13)-Sm(1) | 72.21(10)  |
| C(12)-C(13)-Sm(1) | 77.45(10)  |
| C(18)-C(13)-Sm(1) | 119.27(12) |
| C(10)-C(14)-C(13) | 108.44(16) |
| C(10)-C(14)-Sm(1) | 75.30(10)  |
| C(13)-C(14)-Sm(1) | 78.32(10)  |
| O(1)-C(20)-C(21)  | 108.34(15) |
| O(2)-C(21)-C(20)  | 109.03(15) |
| C(24)-C(23)-C(27) | 107.80(18) |
| C(24)-C(23)-C(28) | 126.0(2)   |
| C(27)-C(23)-C(28) | 126.2(2)   |
| C(24)-C(23)-Sm(2) | 77.04(11)  |
| C(27)-C(23)-Sm(2) | 73.94(10)  |
| C(28)-C(23)-Sm(2) | 117.30(13) |
| C(23)-C(24)-C(25) | 108.37(19) |
| C(23)-C(24)-C(29) | 124.8(2)   |

|                   |            |
|-------------------|------------|
| C(25)-C(24)-C(29) | 126.7(2)   |
| C(23)-C(24)-Sm(2) | 74.18(11)  |
| C(25)-C(24)-Sm(2) | 75.21(11)  |
| C(29)-C(24)-Sm(2) | 120.01(13) |
| C(24)-C(25)-C(26) | 107.78(18) |
| C(24)-C(25)-C(30) | 125.5(2)   |
| C(26)-C(25)-C(30) | 126.7(2)   |
| C(24)-C(25)-Sm(2) | 75.70(11)  |
| C(26)-C(25)-Sm(2) | 73.83(11)  |
| C(30)-C(25)-Sm(2) | 116.76(14) |
| C(27)-C(26)-C(25) | 107.08(19) |
| C(27)-C(26)-C(31) | 124.7(2)   |
| C(25)-C(26)-C(31) | 128.2(2)   |
| C(27)-C(26)-Sm(2) | 74.27(11)  |
| C(25)-C(26)-Sm(2) | 76.80(11)  |
| C(31)-C(26)-Sm(2) | 115.02(15) |
| C(26)-C(27)-C(23) | 108.97(19) |
| C(26)-C(27)-Sm(2) | 76.31(11)  |
| C(23)-C(27)-Sm(2) | 76.63(10)  |
| C(36)-C(32)-C(33) | 107.39(16) |
| C(36)-C(32)-C(37) | 125.18(17) |
| C(33)-C(32)-C(37) | 127.38(18) |
| C(36)-C(32)-Sm(2) | 74.44(10)  |

|                   |            |
|-------------------|------------|
| C(33)-C(32)-Sm(2) | 76.07(10)  |
| C(37)-C(32)-Sm(2) | 117.45(12) |
| C(32)-C(33)-C(34) | 108.07(15) |
| C(32)-C(33)-C(38) | 127.30(17) |
| C(34)-C(33)-C(38) | 124.63(16) |
| C(32)-C(33)-Sm(2) | 74.81(10)  |
| C(34)-C(33)-Sm(2) | 75.76(10)  |
| C(38)-C(33)-Sm(2) | 116.13(11) |
| C(35)-C(34)-C(33) | 108.26(15) |
| C(35)-C(34)-C(39) | 126.11(17) |
| C(33)-C(34)-C(39) | 125.55(16) |
| C(35)-C(34)-Sm(2) | 74.92(10)  |
| C(33)-C(34)-Sm(2) | 75.20(10)  |
| C(39)-C(34)-Sm(2) | 118.79(12) |
| C(36)-C(35)-C(34) | 107.29(16) |
| C(36)-C(35)-C(40) | 125.76(17) |
| C(34)-C(35)-C(40) | 126.82(17) |
| C(36)-C(35)-Sm(2) | 74.12(10)  |
| C(34)-C(35)-Sm(2) | 76.04(10)  |
| C(40)-C(35)-Sm(2) | 118.95(13) |
| C(35)-C(36)-C(32) | 108.99(16) |
| C(35)-C(36)-Sm(2) | 76.67(10)  |
| C(32)-C(36)-Sm(2) | 76.28(10)  |

|                  |            |
|------------------|------------|
| O(3)-C(42)-C(43) | 109.24(15) |
| O(4)-C(43)-C(42) | 108.94(15) |

---

**X-ray Data Collection, Structure Determination, and Refinement for (C<sub>5</sub>Me<sub>4</sub>H)<sub>2</sub>Sm( $\mu$ - $\eta^3$ : $\eta^5$ -C<sub>5</sub>Me<sub>4</sub>H)Sm(C<sub>5</sub>Me<sub>4</sub>H)(THF)<sub>2</sub>, 3.**

A purple crystal of approximate dimensions 0.170 x 0.191 x 0.306 mm was mounted in a cryoloop and transferred to a Bruker SMART APEX II diffractometer system. The APEX2<sup>1</sup> program package was used to determine the unit-cell parameters and for data collection (20 sec/frame scan time). The raw frame data was processed using SAINT<sup>2</sup> and SADABS<sup>3</sup> to yield the reflection data file. Subsequent calculations were carried out using the SHELXTL<sup>4</sup> program package. The diffraction symmetry was  $2/m$  and the systematic absences were consistent with the monoclinic space group  $P2_1/n$  that was later determined to be correct.

The structure was solved by direct methods and refined on  $F^2$  by full-matrix least-squares techniques. The analytical scattering factors<sup>5</sup> for neutral atoms were used throughout the analysis. Hydrogen atoms were included using a riding model.

Least-squares analysis yielded  $wR2 = 0.0536$  and  $Goof = 1.021$  for 449 variables refined against 12542 data (0.70 Å),  $R1 = 0.0239$  for those 10610 data with  $I > 2.0\sigma(I)$ .

**Table S3.** Crystal data and structure refinement for jqn20.

|                     |                                                                |
|---------------------|----------------------------------------------------------------|
| Identification code | jqn20 (Joseph Nguyen)                                          |
| Empirical formula   | C <sub>44</sub> H <sub>68</sub> O <sub>2</sub> Sm <sub>2</sub> |
| Formula weight      | 929.68                                                         |
| Temperature         | 133(2) K                                                       |

|                                 |                                                              |                               |
|---------------------------------|--------------------------------------------------------------|-------------------------------|
| Wavelength                      | 0.71073 Å                                                    |                               |
| Crystal system                  | Monoclinic                                                   |                               |
| Space group                     | $P2_1/n$                                                     |                               |
| Unit cell dimensions            | $a = 11.4458(8)$ Å                                           | $\alpha = 90^\circ$ .         |
|                                 | $b = 15.6042(11)$ Å                                          | $\beta = 92.6546(12)^\circ$ . |
|                                 | $c = 23.3099(17)$ Å                                          | $\gamma = 90^\circ$ .         |
| Volume                          | 4158.7(5) Å <sup>3</sup>                                     |                               |
| Z                               | 4                                                            |                               |
| Density (calculated)            | 1.485 Mg/m <sup>3</sup>                                      |                               |
| Absorption coefficient          | 2.829 mm <sup>-1</sup>                                       |                               |
| F(000)                          | 1888                                                         |                               |
| Crystal color                   | purple                                                       |                               |
| Crystal size                    | 0.306 x 0.191 x 0.170 mm <sup>3</sup>                        |                               |
| Theta range for data collection | 1.571 to 30.539°                                             |                               |
| Index ranges                    | $-16 \leq h \leq 16, -21 \leq k \leq 22, -33 \leq l \leq 33$ |                               |
| Reflections collected           | 101857                                                       |                               |
| Independent reflections         | 12542 [R(int) = 0.0529]                                      |                               |
| Completeness to theta = 25.242° | 100.0 %                                                      |                               |
| Absorption correction           | Semi-empirical from equivalents                              |                               |
| Max. and min. transmission      | 0.7461 and 0.5948                                            |                               |
| Refinement method               | Full-matrix least-squares on F <sup>2</sup>                  |                               |
| Data / restraints / parameters  | 12542 / 0 / 449                                              |                               |



|                                                  |                                    |
|--------------------------------------------------|------------------------------------|
| Goodness-of-fit on $F^2$                         | 1.021                              |
| Final R indices [ $I > 2\sigma(I)$ = 10610 data] | R1 = 0.0239, wR2 = 0.0496          |
| R indices (all data, 0.70 Å)                     | R1 = 0.0339, wR2 = 0.0536          |
| Largest diff. peak and hole                      | 0.923 and -0.477 e.Å <sup>-3</sup> |

**Table S4.** Bond lengths [Å] and angles [°] for jqn20.

---

|             |          |
|-------------|----------|
| Sm(1)-Cnt1  | 2.584    |
| Sm(1)-Cnt2  | 2.581    |
| Sm(1)-C(14) | 2.748(2) |
| Sm(1)-C(5)  | 2.751(2) |
| Sm(1)-C(13) | 2.791(2) |
| Sm(1)-C(4)  | 2.810(2) |
| Sm(1)-C(1)  | 2.819(2) |
| Sm(1)-C(10) | 2.831(2) |
| Sm(1)-C(32) | 2.842(2) |
| Sm(1)-C(12) | 2.919(2) |
| Sm(1)-C(2)  | 2.931(2) |
| Sm(1)-C(3)  | 2.932(2) |
| Sm(1)-C(11) | 2.940(2) |
| Sm(1)-C(31) | 2.955(2) |
| Sm(2)-Cnt3  | 2.537    |
| Sm(2)-Cnt4  | 2.586    |

|             |            |
|-------------|------------|
| Sm(2)-O(1)  | 2.5770(15) |
| Sm(2)-O(2)  | 2.5970(16) |
| Sm(2)-C(23) | 2.799(2)   |
| Sm(2)-C(21) | 2.804(2)   |
| Sm(2)-C(20) | 2.806(2)   |
| Sm(2)-C(32) | 2.807(2)   |
| Sm(2)-C(22) | 2.811(2)   |
| Sm(2)-C(19) | 2.814(2)   |
| Sm(2)-C(28) | 2.8346(19) |
| Sm(2)-C(31) | 2.864(2)   |
| Sm(2)-C(29) | 2.872(2)   |
| Sm(2)-C(30) | 2.888(2)   |
| O(1)-C(37)  | 1.447(3)   |
| O(1)-C(40)  | 1.448(3)   |
| O(2)-C(44)  | 1.444(3)   |
| O(2)-C(41)  | 1.455(3)   |
| C(1)-C(5)   | 1.409(3)   |
| C(1)-C(2)   | 1.414(3)   |
| C(1)-C(6)   | 1.514(3)   |
| C(2)-C(3)   | 1.415(3)   |
| C(2)-C(7)   | 1.503(3)   |
| C(3)-C(4)   | 1.409(3)   |
| C(3)-C(8)   | 1.506(3)   |

|             |          |
|-------------|----------|
| C(4)-C(5)   | 1.413(3) |
| C(4)-C(9)   | 1.510(3) |
| C(10)-C(11) | 1.409(3) |
| C(10)-C(14) | 1.412(3) |
| C(10)-C(15) | 1.503(3) |
| C(11)-C(12) | 1.416(3) |
| C(11)-C(16) | 1.507(3) |
| C(12)-C(13) | 1.413(3) |
| C(12)-C(17) | 1.505(3) |
| C(13)-C(14) | 1.410(3) |
| C(13)-C(18) | 1.506(3) |
| C(19)-C(20) | 1.403(3) |
| C(19)-C(23) | 1.414(3) |
| C(19)-C(24) | 1.510(3) |
| C(20)-C(21) | 1.421(3) |
| C(20)-C(25) | 1.498(3) |
| C(21)-C(22) | 1.409(3) |
| C(21)-C(26) | 1.501(3) |
| C(22)-C(23) | 1.411(3) |
| C(22)-C(27) | 1.499(3) |
| C(28)-C(32) | 1.412(3) |
| C(28)-C(29) | 1.413(3) |
| C(28)-C(33) | 1.505(3) |

|             |          |
|-------------|----------|
| C(29)-C(30) | 1.421(3) |
| C(29)-C(34) | 1.502(3) |
| C(30)-C(31) | 1.416(3) |
| C(30)-C(35) | 1.503(3) |
| C(31)-C(32) | 1.421(3) |
| C(31)-C(36) | 1.504(3) |
| C(37)-C(38) | 1.513(3) |
| C(38)-C(39) | 1.515(4) |
| C(39)-C(40) | 1.515(3) |
| C(41)-C(42) | 1.515(4) |
| C(42)-C(43) | 1.507(4) |
| C(43)-C(44) | 1.505(4) |

|                   |           |
|-------------------|-----------|
| Cnt1-Sm(1)-Cnt2   | 122.8     |
| C(14)-Sm(1)-C(5)  | 122.82(7) |
| C(14)-Sm(1)-C(13) | 29.48(6)  |
| C(5)-Sm(1)-C(13)  | 105.96(6) |
| C(14)-Sm(1)-C(4)  | 135.21(6) |
| C(5)-Sm(1)-C(4)   | 29.41(6)  |
| C(13)-Sm(1)-C(4)  | 130.99(6) |
| C(14)-Sm(1)-C(1)  | 133.88(6) |
| C(5)-Sm(1)-C(1)   | 29.27(6)  |
| C(13)-Sm(1)-C(1)  | 106.65(6) |

|                   |           |
|-------------------|-----------|
| C(4)-Sm(1)-C(1)   | 48.06(6)  |
| C(14)-Sm(1)-C(10) | 29.27(6)  |
| C(5)-Sm(1)-C(10)  | 102.34(6) |
| C(13)-Sm(1)-C(10) | 48.12(6)  |
| C(4)-Sm(1)-C(10)  | 106.76(6) |
| C(1)-Sm(1)-C(10)  | 125.39(6) |
| C(14)-Sm(1)-C(32) | 115.82(6) |
| C(5)-Sm(1)-C(32)  | 121.25(6) |
| C(13)-Sm(1)-C(32) | 128.02(6) |
| C(4)-Sm(1)-C(32)  | 100.75(6) |
| C(1)-Sm(1)-C(32)  | 104.71(6) |
| C(10)-Sm(1)-C(32) | 129.32(6) |
| C(14)-Sm(1)-C(12) | 47.29(6)  |
| C(5)-Sm(1)-C(12)  | 78.76(6)  |
| C(13)-Sm(1)-C(12) | 28.54(6)  |
| C(4)-Sm(1)-C(12)  | 102.45(6) |
| C(1)-Sm(1)-C(12)  | 87.10(6)  |
| C(10)-Sm(1)-C(12) | 46.92(6)  |
| C(32)-Sm(1)-C(12) | 156.20(6) |
| C(14)-Sm(1)-C(2)  | 160.97(6) |
| C(5)-Sm(1)-C(2)   | 47.12(6)  |
| C(13)-Sm(1)-C(2)  | 131.66(6) |
| C(4)-Sm(1)-C(2)   | 46.90(6)  |

|                   |           |
|-------------------|-----------|
| C(1)-Sm(1)-C(2)   | 28.39(6)  |
| C(10)-Sm(1)-C(2)  | 149.40(6) |
| C(32)-Sm(1)-C(2)  | 77.50(6)  |
| C(12)-Sm(1)-C(2)  | 115.42(6) |
| C(14)-Sm(1)-C(3)  | 162.70(6) |
| C(5)-Sm(1)-C(3)   | 47.10(6)  |
| C(13)-Sm(1)-C(3)  | 152.02(6) |
| C(4)-Sm(1)-C(3)   | 28.31(6)  |
| C(1)-Sm(1)-C(3)   | 46.87(6)  |
| C(10)-Sm(1)-C(3)  | 133.44(6) |
| C(32)-Sm(1)-C(3)  | 75.22(6)  |
| C(12)-Sm(1)-C(3)  | 125.86(6) |
| C(2)-Sm(1)-C(3)   | 27.93(6)  |
| C(14)-Sm(1)-C(11) | 46.98(6)  |
| C(5)-Sm(1)-C(11)  | 76.94(6)  |
| C(13)-Sm(1)-C(11) | 46.92(6)  |
| C(4)-Sm(1)-C(11)  | 90.13(6)  |
| C(1)-Sm(1)-C(11)  | 97.33(6)  |
| C(10)-Sm(1)-C(11) | 28.18(6)  |
| C(32)-Sm(1)-C(11) | 157.38(6) |
| C(12)-Sm(1)-C(11) | 27.96(6)  |
| C(2)-Sm(1)-C(11)  | 123.31(6) |
| C(3)-Sm(1)-C(11)  | 118.27(6) |

|                   |           |
|-------------------|-----------|
| C(14)-Sm(1)-C(31) | 98.23(6)  |
| C(5)-Sm(1)-C(31)  | 131.47(6) |
| C(13)-Sm(1)-C(31) | 121.78(6) |
| C(4)-Sm(1)-C(31)  | 103.08(6) |
| C(1)-Sm(1)-C(31)  | 127.42(6) |
| C(10)-Sm(1)-C(31) | 102.98(6) |
| C(32)-Sm(1)-C(31) | 28.30(6)  |
| C(12)-Sm(1)-C(31) | 145.44(6) |
| C(2)-Sm(1)-C(31)  | 99.04(6)  |
| C(3)-Sm(1)-C(31)  | 86.12(6)  |
| C(11)-Sm(1)-C(31) | 129.88(6) |
| Cnt3-Sm(2)-Cnt4   | 130.2     |
| O(1)-Sm(2)-O(2)   | 97.82(5)  |
| O(1)-Sm(2)-C(23)  | 90.21(6)  |
| O(2)-Sm(2)-C(23)  | 130.17(6) |
| O(1)-Sm(2)-C(21)  | 104.72(6) |
| O(2)-Sm(2)-C(21)  | 82.77(6)  |
| C(23)-Sm(2)-C(21) | 47.84(7)  |
| O(1)-Sm(2)-C(20)  | 130.02(6) |
| O(2)-Sm(2)-C(20)  | 93.69(6)  |
| C(23)-Sm(2)-C(20) | 47.83(7)  |
| C(21)-Sm(2)-C(20) | 29.35(6)  |
| O(1)-Sm(2)-C(32)  | 118.68(6) |

|                   |           |
|-------------------|-----------|
| O(2)-Sm(2)-C(32)  | 120.72(6) |
| C(23)-Sm(2)-C(32) | 96.75(6)  |
| C(21)-Sm(2)-C(32) | 124.33(6) |
| C(20)-Sm(2)-C(32) | 95.45(6)  |
| O(1)-Sm(2)-C(22)  | 81.87(6)  |
| O(2)-Sm(2)-C(22)  | 103.54(6) |
| C(23)-Sm(2)-C(22) | 29.13(6)  |
| C(21)-Sm(2)-C(22) | 29.07(6)  |
| C(20)-Sm(2)-C(22) | 48.17(6)  |
| C(32)-Sm(2)-C(22) | 125.18(6) |
| O(1)-Sm(2)-C(19)  | 119.17(6) |
| O(2)-Sm(2)-C(19)  | 122.58(6) |
| C(23)-Sm(2)-C(19) | 29.18(7)  |
| C(21)-Sm(2)-C(19) | 48.04(6)  |
| C(20)-Sm(2)-C(19) | 28.90(7)  |
| C(32)-Sm(2)-C(19) | 79.69(6)  |
| C(22)-Sm(2)-C(19) | 48.20(6)  |
| O(1)-Sm(2)-C(28)  | 126.61(6) |
| O(2)-Sm(2)-C(28)  | 91.86(6)  |
| C(23)-Sm(2)-C(28) | 121.72(6) |
| C(21)-Sm(2)-C(28) | 128.61(6) |
| C(20)-Sm(2)-C(28) | 101.24(6) |
| C(32)-Sm(2)-C(28) | 28.99(6)  |



|                   |           |
|-------------------|-----------|
| C(22)-Sm(2)-C(28) | 145.78(6) |
| C(19)-Sm(2)-C(28) | 97.78(6)  |
| O(1)-Sm(2)-C(31)  | 89.68(5)  |
| O(2)-Sm(2)-C(31)  | 130.33(6) |
| C(23)-Sm(2)-C(31) | 98.61(6)  |
| C(21)-Sm(2)-C(31) | 142.29(6) |
| C(20)-Sm(2)-C(31) | 118.17(6) |
| C(32)-Sm(2)-C(31) | 29.01(6)  |
| C(22)-Sm(2)-C(31) | 126.13(6) |
| C(19)-Sm(2)-C(31) | 94.44(6)  |
| C(28)-Sm(2)-C(31) | 47.66(6)  |
| O(1)-Sm(2)-C(29)  | 100.76(5) |
| O(2)-Sm(2)-C(29)  | 83.17(6)  |
| C(23)-Sm(2)-C(29) | 143.38(6) |
| C(21)-Sm(2)-C(29) | 152.30(6) |
| C(20)-Sm(2)-C(29) | 128.91(6) |
| C(32)-Sm(2)-C(29) | 47.39(6)  |
| C(22)-Sm(2)-C(29) | 172.48(6) |
| C(19)-Sm(2)-C(29) | 125.25(6) |
| C(28)-Sm(2)-C(29) | 28.67(6)  |
| C(31)-Sm(2)-C(29) | 47.28(6)  |
| O(1)-Sm(2)-C(30)  | 79.69(5)  |
| O(2)-Sm(2)-C(30)  | 104.97(6) |

|                   |            |
|-------------------|------------|
| C(23)-Sm(2)-C(30) | 124.83(6)  |
| C(21)-Sm(2)-C(30) | 170.67(6)  |
| C(20)-Sm(2)-C(30) | 142.70(6)  |
| C(32)-Sm(2)-C(30) | 47.25(6)   |
| C(22)-Sm(2)-C(30) | 147.77(6)  |
| C(19)-Sm(2)-C(30) | 122.64(6)  |
| C(28)-Sm(2)-C(30) | 47.22(6)   |
| C(31)-Sm(2)-C(30) | 28.49(6)   |
| C(29)-Sm(2)-C(30) | 28.57(6)   |
| C(37)-O(1)-C(40)  | 109.09(16) |
| C(37)-O(1)-Sm(2)  | 126.29(13) |
| C(40)-O(1)-Sm(2)  | 124.14(13) |
| C(44)-O(2)-C(41)  | 107.98(18) |
| C(44)-O(2)-Sm(2)  | 127.91(14) |
| C(41)-O(2)-Sm(2)  | 123.53(14) |
| C(5)-C(1)-C(2)    | 107.6(2)   |
| C(5)-C(1)-C(6)    | 127.8(2)   |
| C(2)-C(1)-C(6)    | 124.6(2)   |
| C(5)-C(1)-Sm(1)   | 72.71(12)  |
| C(2)-C(1)-Sm(1)   | 80.22(12)  |
| C(6)-C(1)-Sm(1)   | 115.30(14) |
| C(1)-C(2)-C(3)    | 108.0(2)   |
| C(1)-C(2)-C(7)    | 124.7(2)   |

|                   |            |
|-------------------|------------|
| C(3)-C(2)-C(7)    | 126.8(2)   |
| C(1)-C(2)-Sm(1)   | 71.39(12)  |
| C(3)-C(2)-Sm(1)   | 76.06(12)  |
| C(7)-C(2)-Sm(1)   | 124.29(14) |
| C(4)-C(3)-C(2)    | 108.17(19) |
| C(4)-C(3)-C(8)    | 125.4(2)   |
| C(2)-C(3)-C(8)    | 125.9(2)   |
| C(4)-C(3)-Sm(1)   | 71.03(12)  |
| C(2)-C(3)-Sm(1)   | 76.01(12)  |
| C(8)-C(3)-Sm(1)   | 125.54(14) |
| C(3)-C(4)-C(5)    | 107.6(2)   |
| C(3)-C(4)-C(9)    | 125.7(2)   |
| C(5)-C(4)-C(9)    | 126.7(2)   |
| C(3)-C(4)-Sm(1)   | 80.66(12)  |
| C(5)-C(4)-Sm(1)   | 73.00(12)  |
| C(9)-C(4)-Sm(1)   | 115.57(15) |
| C(1)-C(5)-C(4)    | 108.6(2)   |
| C(1)-C(5)-Sm(1)   | 78.02(12)  |
| C(4)-C(5)-Sm(1)   | 77.59(12)  |
| C(11)-C(10)-C(14) | 107.44(18) |
| C(11)-C(10)-C(15) | 125.3(2)   |
| C(14)-C(10)-C(15) | 127.2(2)   |
| C(11)-C(10)-Sm(1) | 80.21(12)  |

|                   |            |
|-------------------|------------|
| C(14)-C(10)-Sm(1) | 72.12(11)  |
| C(15)-C(10)-Sm(1) | 116.42(15) |
| C(10)-C(11)-C(12) | 108.38(19) |
| C(10)-C(11)-C(16) | 125.3(2)   |
| C(12)-C(11)-C(16) | 126.0(2)   |
| C(10)-C(11)-Sm(1) | 71.60(12)  |
| C(12)-C(11)-Sm(1) | 75.21(12)  |
| C(16)-C(11)-Sm(1) | 124.37(15) |
| C(13)-C(12)-C(11) | 107.82(18) |
| C(13)-C(12)-C(17) | 125.7(2)   |
| C(11)-C(12)-C(17) | 126.2(2)   |
| C(13)-C(12)-Sm(1) | 70.69(11)  |
| C(11)-C(12)-Sm(1) | 76.83(12)  |
| C(17)-C(12)-Sm(1) | 123.33(14) |
| C(14)-C(13)-C(12) | 107.65(18) |
| C(14)-C(13)-C(18) | 126.53(19) |
| C(12)-C(13)-C(18) | 125.81(19) |
| C(14)-C(13)-Sm(1) | 73.57(12)  |
| C(12)-C(13)-Sm(1) | 80.78(12)  |
| C(18)-C(13)-Sm(1) | 111.04(13) |
| C(13)-C(14)-C(10) | 108.69(18) |
| C(13)-C(14)-Sm(1) | 76.95(12)  |
| C(10)-C(14)-Sm(1) | 78.62(12)  |

|                   |            |
|-------------------|------------|
| C(20)-C(19)-C(23) | 107.55(19) |
| C(20)-C(19)-C(24) | 125.9(2)   |
| C(23)-C(19)-C(24) | 126.1(2)   |
| C(20)-C(19)-Sm(2) | 75.22(12)  |
| C(23)-C(19)-Sm(2) | 74.81(12)  |
| C(24)-C(19)-Sm(2) | 121.87(14) |
| C(19)-C(20)-C(21) | 108.16(19) |
| C(19)-C(20)-C(25) | 125.2(2)   |
| C(21)-C(20)-C(25) | 126.5(2)   |
| C(19)-C(20)-Sm(2) | 75.88(12)  |
| C(21)-C(20)-Sm(2) | 75.28(12)  |
| C(25)-C(20)-Sm(2) | 118.27(15) |
| C(22)-C(21)-C(20) | 108.13(19) |
| C(22)-C(21)-C(26) | 124.6(2)   |
| C(20)-C(21)-C(26) | 127.1(2)   |
| C(22)-C(21)-Sm(2) | 75.71(12)  |
| C(20)-C(21)-Sm(2) | 75.37(12)  |
| C(26)-C(21)-Sm(2) | 118.68(14) |
| C(21)-C(22)-C(23) | 107.34(19) |
| C(21)-C(22)-C(27) | 125.7(2)   |
| C(23)-C(22)-C(27) | 126.8(2)   |
| C(21)-C(22)-Sm(2) | 75.22(12)  |
| C(23)-C(22)-Sm(2) | 74.96(12)  |

|                   |            |
|-------------------|------------|
| C(27)-C(22)-Sm(2) | 118.68(15) |
| C(22)-C(23)-C(19) | 108.8(2)   |
| C(22)-C(23)-Sm(2) | 75.91(13)  |
| C(19)-C(23)-Sm(2) | 76.01(12)  |
| C(32)-C(28)-C(29) | 107.80(18) |
| C(32)-C(28)-C(33) | 126.25(19) |
| C(29)-C(28)-C(33) | 125.93(19) |
| C(32)-C(28)-Sm(2) | 74.40(11)  |
| C(29)-C(28)-Sm(2) | 77.13(11)  |
| C(33)-C(28)-Sm(2) | 113.57(14) |
| C(32)-C(28)-Sm(1) | 71.21(11)  |
| C(29)-C(28)-Sm(1) | 84.59(12)  |
| C(33)-C(28)-Sm(1) | 111.80(13) |
| Sm(2)-C(28)-Sm(1) | 133.52(7)  |
| C(28)-C(29)-C(30) | 107.97(18) |
| C(28)-C(29)-C(34) | 125.88(19) |
| C(30)-C(29)-C(34) | 126.04(19) |
| C(28)-C(29)-Sm(2) | 74.20(11)  |
| C(30)-C(29)-Sm(2) | 76.35(11)  |
| C(34)-C(29)-Sm(2) | 112.61(13) |
| C(31)-C(30)-C(29) | 108.32(18) |
| C(31)-C(30)-C(35) | 126.16(19) |
| C(29)-C(30)-C(35) | 125.48(19) |

|                   |            |
|-------------------|------------|
| C(31)-C(30)-Sm(2) | 74.80(12)  |
| C(29)-C(30)-Sm(2) | 75.09(12)  |
| C(35)-C(30)-Sm(2) | 114.63(13) |
| C(30)-C(31)-C(32) | 107.20(18) |
| C(30)-C(31)-C(36) | 126.61(19) |
| C(32)-C(31)-C(36) | 126.19(19) |
| C(30)-C(31)-Sm(2) | 76.70(12)  |
| C(32)-C(31)-Sm(2) | 73.26(11)  |
| C(36)-C(31)-Sm(2) | 115.60(14) |
| C(30)-C(31)-Sm(1) | 84.54(12)  |
| C(32)-C(31)-Sm(1) | 71.42(11)  |
| C(36)-C(31)-Sm(1) | 110.64(13) |
| Sm(2)-C(31)-Sm(1) | 132.54(7)  |
| C(28)-C(32)-C(31) | 108.70(18) |
| C(28)-C(32)-Sm(2) | 76.61(11)  |
| C(31)-C(32)-Sm(2) | 77.73(11)  |
| C(28)-C(32)-Sm(1) | 80.73(12)  |
| C(31)-C(32)-Sm(1) | 80.28(12)  |
| Sm(2)-C(32)-Sm(1) | 141.17(8)  |
| O(1)-C(37)-C(38)  | 105.27(19) |
| C(37)-C(38)-C(39) | 101.7(2)   |
| C(40)-C(39)-C(38) | 102.66(19) |
| O(1)-C(40)-C(39)  | 106.13(19) |

|                   |          |
|-------------------|----------|
| O(2)-C(41)-C(42)  | 106.7(2) |
| C(43)-C(42)-C(41) | 103.3(2) |
| C(44)-C(43)-C(42) | 101.8(2) |
| O(2)-C(44)-C(43)  | 105.6(2) |

---

## References

1. *APEX2* Version 2014.11-0, Bruker AXS, Inc.: Madison, WI, USA, 2014.
2. *SAINT* Version 8.34a, Bruker AXS, Inc.: Madison, WI, USA, 2013.
3. Sheldrick, G. M. *SADABS*, Version 2014/5, Bruker AXS, Inc.: Madison, WI, USA, 2014.
4. Sheldrick, G. M. *SHELXTL*, Version 2014/7, Bruker AXS, Inc.: Madison, WI, USA, 2014.
5. *International Tables for Crystallography 1992, Volume C.*: Kluwer Academic Publishers: Dordrecht, The Netherlands, 2004.
